# Supplementary material for: Epidemiological characterisation of asymptomatic carriers of COVID-19 in Colombia: a cross-sectional study
Source: HighWire-hosted journal article supplement (doi:10.1136/bmjopen-2020-042122), 2020-12-01
Supplement: bmjopen-2020-042122supp003_data_supplement.pdf [file bmjopen-2020-042122supp003_data_supplement.pdf]

**Table S2.** Factors associated with AC state in Colombia.

| Variable                     | Main effects  |                     |                  |
|------------------------------|---------------|---------------------|------------------|
|                              | $\beta$       | ORa (95%, CI)       | p-value          |
| <b>Intercept</b>             | <b>-7.360</b> | -                   | <b>&lt;0.001</b> |
| <b>Age,</b>                  |               |                     |                  |
| >26 years old                | <b>Ref.</b>   | -                   | -                |
| 0-26 years old               | 0.205         | 1.227 (1.205-1.250) | <b>&lt;0.001</b> |
| <b>Sex</b>                   |               |                     |                  |
| Female                       | <b>Ref.</b>   | -                   | -                |
| Male                         | 0.054         | 1.055 (1.038-1.073) | <b>&lt;0.001</b> |
| <b>Department</b>            |               |                     |                  |
| Low risk                     | <b>Ref.</b>   | -                   | -                |
| Moderate risk                | 1.304         | 3.372 (3.134-4.330) | <b>&lt;0.001</b> |
| Strong risk                  | 1.909         | 8.310 (6.101-7.464) | <b>&lt;0.001</b> |
| <b>Geographical origin</b>   |               |                     |                  |
| Imported CAS <sup>†</sup>    | <b>Ref.</b>   | -                   | -                |
| Imported CA-AC <sup>††</sup> | 2.541         | 12.68 (3.049-52.77) | <b>&lt;0.001</b> |
| Related cases <sup>†††</sup> | 3.255         | 25.90 (6.425-104.4) | <b>&lt;0.001</b> |
| <b>EW</b>                    |               |                     |                  |
| 10-34                        | <b>Ref.</b>   | -                   | -                |
| ≥35                          | 0.933         | 2.543 (2.484-2.603) | <b>&lt;0.001</b> |

<sup>†</sup>: CAS countries associated to symptomatic patients, <sup>††</sup>: CA-AC countries associated to ACs, <sup>†††</sup>: spontaneous cases, EW: epidemiological week.
