# Supplementary material for: Epidemiological characterisation of asymptomatic carriers of COVID-19 in Colombia: a cross-sectional study
Source: HighWire-hosted journal article supplement (doi:10.1136/bmjopen-2020-042122), 2020-12-01
Supplement: bmjopen-2020-042122supp004_data_supplement.pdf [file bmjopen-2020-042122supp004_data_supplement.pdf]

STROBE Statement—checklist of items that should be included in reports of observational studies

|                           | Item No | Page and relevant text from manuscript  |
|---------------------------|---------|-----------------------------------------|
| Title and abstract        | 1       | (Page 1) A cross-sectional study        |
|                           |         | (Page 2) It is reported in the abstract |
| Introduction              |         |                                         |
| Background/rationale      | 2       | (Page 4-5)                              |
| Objectives                | 3       | (Page 5)                                |
| Methods                   |         |                                         |
| Study design              | 4       | (Page 5)                                |
| Setting                   | 5       | (Page 5)                                |
| Participants              | 6       | (Page 5-7) <i>Cross-sectional study</i> |
| Results                   |         |                                         |
| Variables                 | 7       | (Page 6)                                |
| Data sources/ measurement | 8*      | (Page 6-7)                              |
| Bias                      | 9       | (Page 7)                                |
| Study size                | 10      | (Page 5)                                |
| Quantitative variables    | 11      | (Page 6)                                |
| Statistical methods       | 12      | (Page 5-7)                              |
| Continued on next page    |         |                                         |

|                          |     |              |
|--------------------------|-----|--------------|
| <b>Results</b>           |     |              |
| Participants             | 13* | (Page 7-8)   |
| Descriptive data         | 14* | (Page 7-9)   |
| Outcome data             | 15* | (Page 7-10)  |
| Main results             | 16  | (Page 7-10)  |
| Other analyses           | 17  | NA           |
| <b>Discussion</b>        |     |              |
| Key results              | 18  | (Page 10-11) |
| Limitations              | 19  | (Page 11-12) |
| Interpretation           | 20  | (Page 11-13) |
| Generalisability         | 21  | (Page 13)    |
| <b>Other information</b> |     |              |
| Funding                  | 22  | (Page 14)    |

\*Give information separately for cases and controls in case-control studies and, if applicable, for exposed and unexposed groups in cohort and cross-sectional studies.

**Note:** An Explanation and Elaboration article discusses each checklist item and gives methodological background and published examples of transparent reporting. The STROBE checklist is best used in conjunction with this article (freely available on the Web sites of PLoS Medicine at <http://www.plosmedicine.org/>, Annals of Internal Medicine at <http://www.annals.org/>, and Epidemiology at <http://www.epidem.com/>). Information on the STROBE Initiative is available at [www.strobe-statement.org](http://www.strobe-statement.org).
