# Supplementary figures and images for: Epidemiological characterisation of asymptomatic carriers of COVID-19 in Colombia: a cross-sectional study
Source: HighWire-hosted journal article supplement (doi:10.1136/bmjopen-2020-042122), 2020-12-01

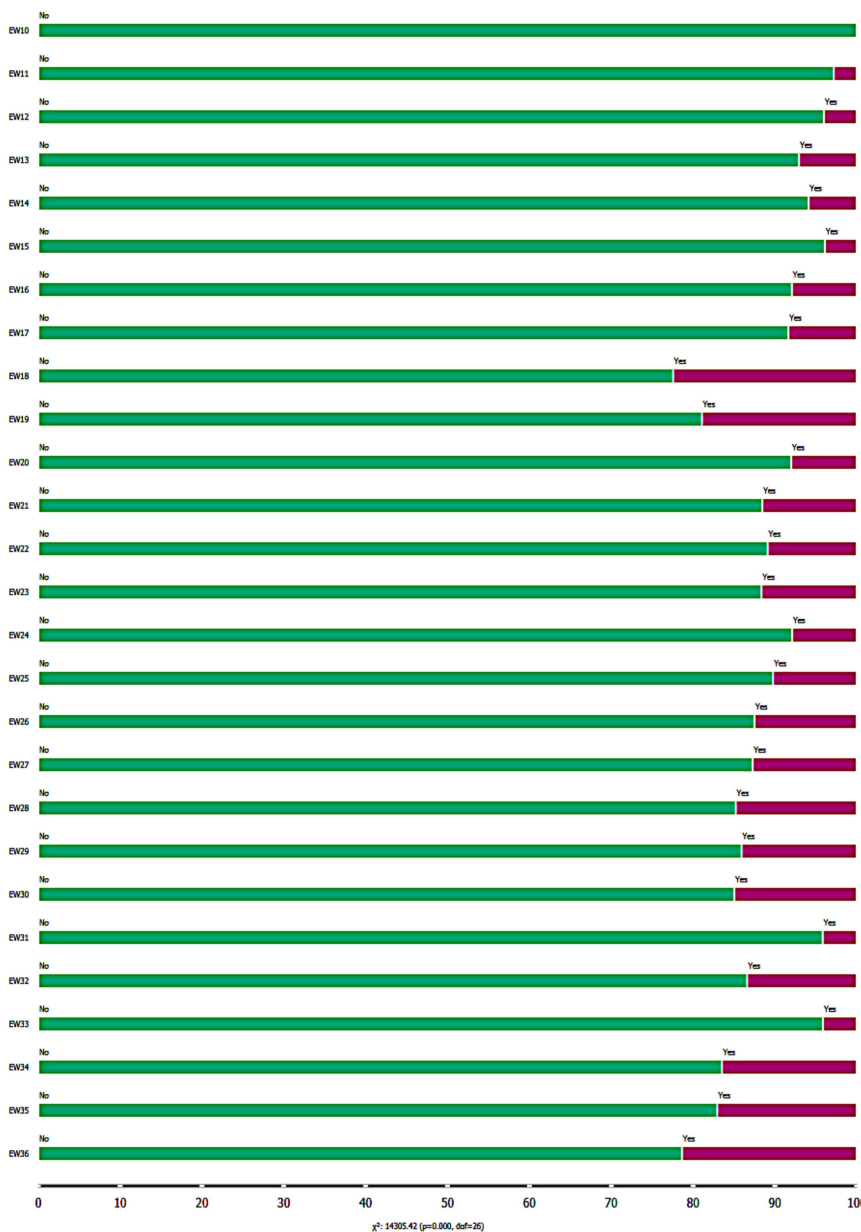

Supplement: bmjopen-2020-042122supp001_data_supplement.pdf [file bmjopen-2020-042122supp001_data_supplement.pdf]
